# Supplementary material
Source: PubMed Central journal article supplement (PMC2077244)
Supplement: pnas_0705847104_7.pdf [file pnas_0705847104_7.pdf]

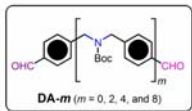

PCC / CH<sub>2</sub>Cl<sub>2</sub>

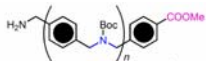

i) PhMe / Dean - Stark  
ii) NaBH<sub>4</sub> / THF / MeOH

***N* = *N* + 2 when using 8a; *N* = *N* + 4 when using 8b**

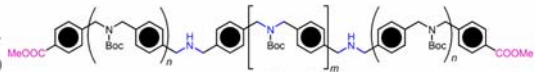

Boc<sub>2</sub>O / TEA / CHCl<sub>3</sub>

LiAlH<sub>4</sub>

THF

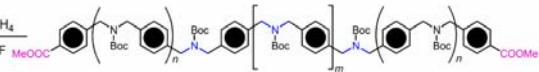

**14(*m*, *n*)**

**13(*m*, *n*)**
