# Supplementary material
Source: PubMed Central journal article supplement (PMC2077244)

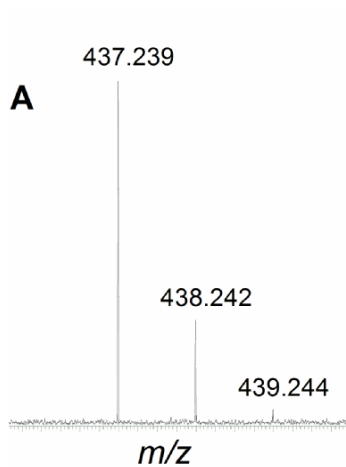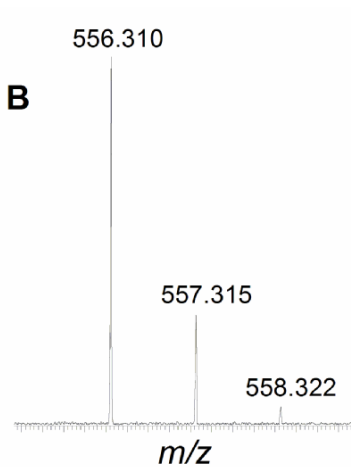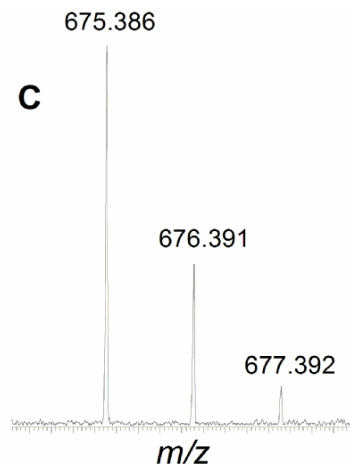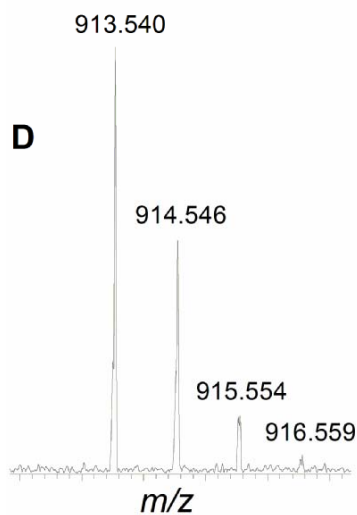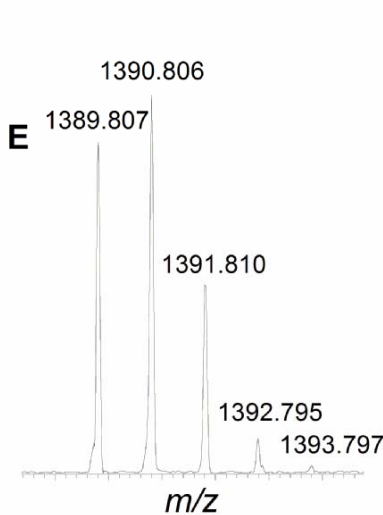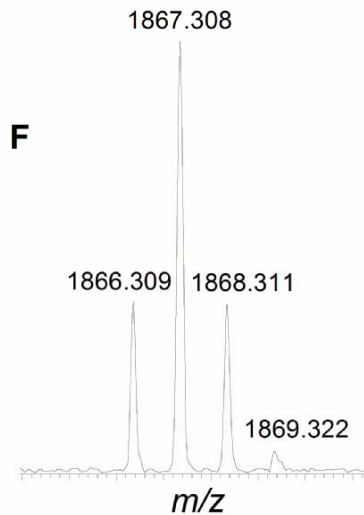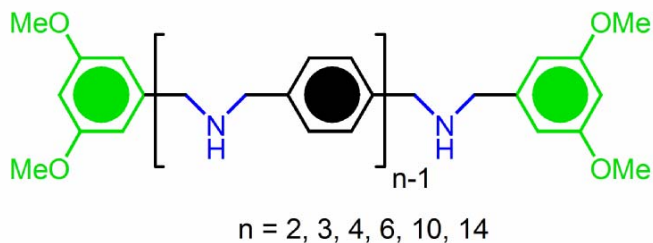

Supplement: pnas_0705847104_1.pdf [file pnas_0705847104_1.pdf]

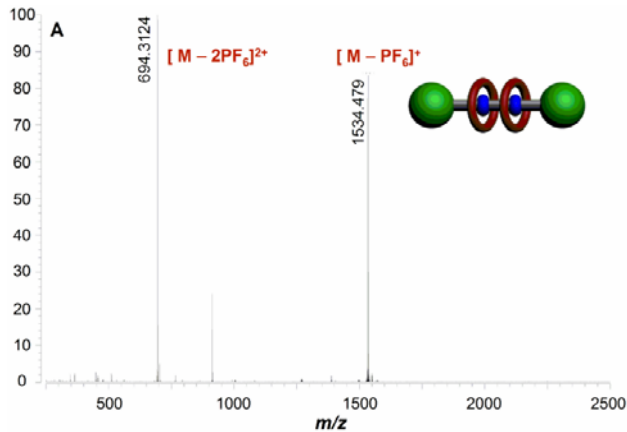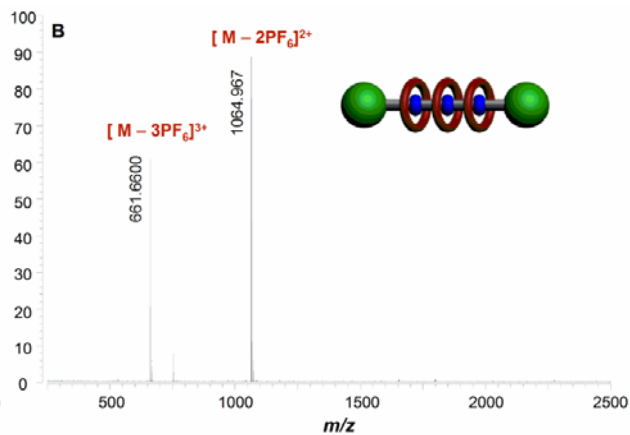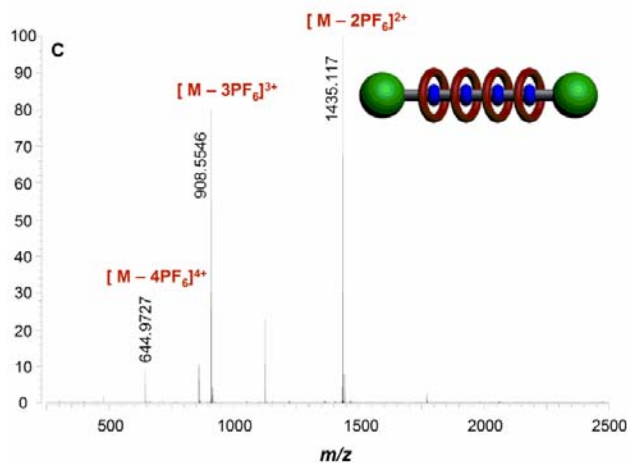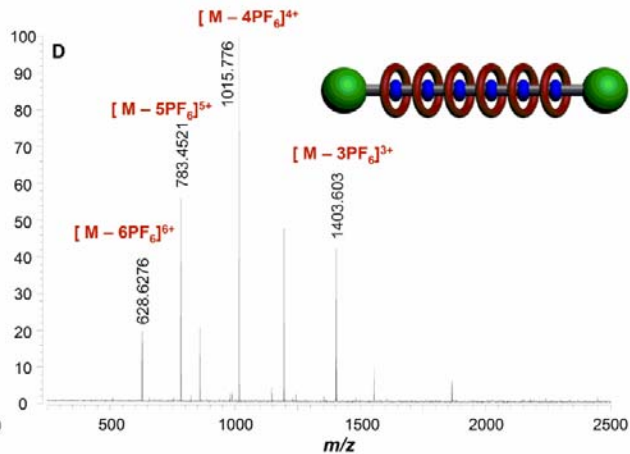

Supplement: pnas_0705847104_2.pdf [file pnas_0705847104_2.pdf]

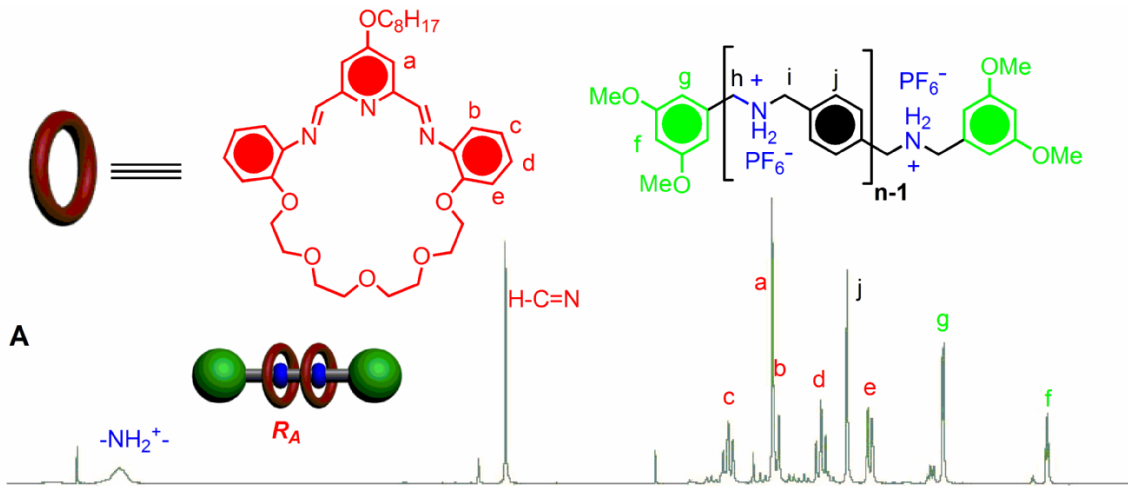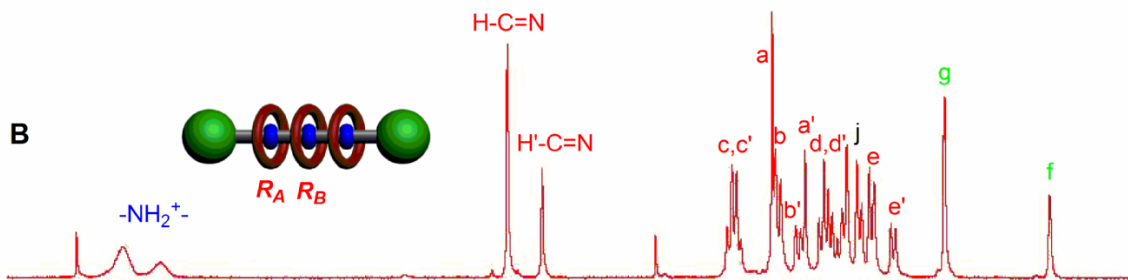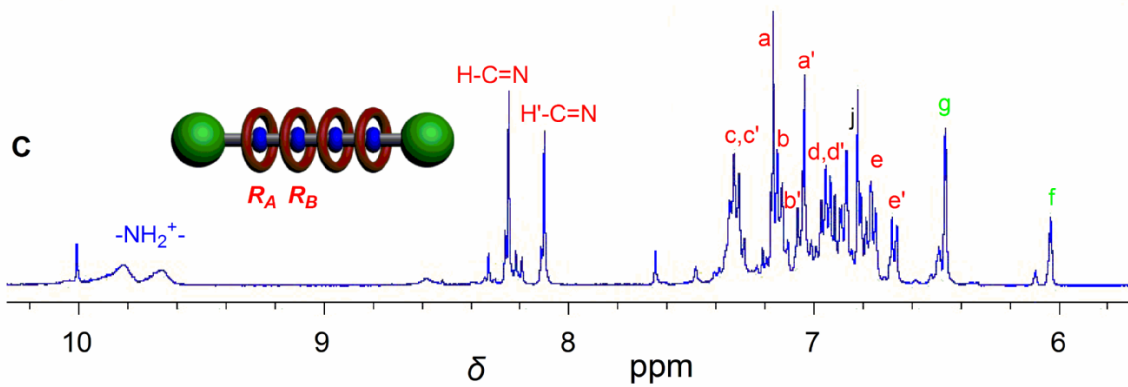

Supplement: pnas_0705847104_3.pdf [file pnas_0705847104_3.pdf]

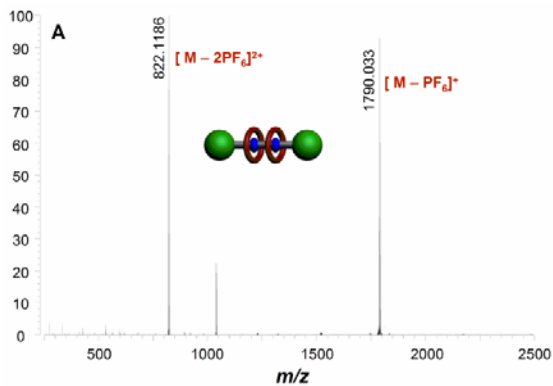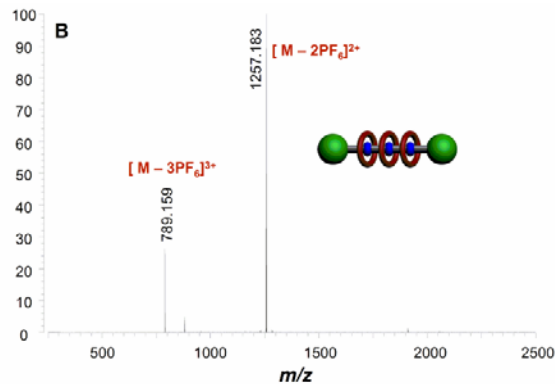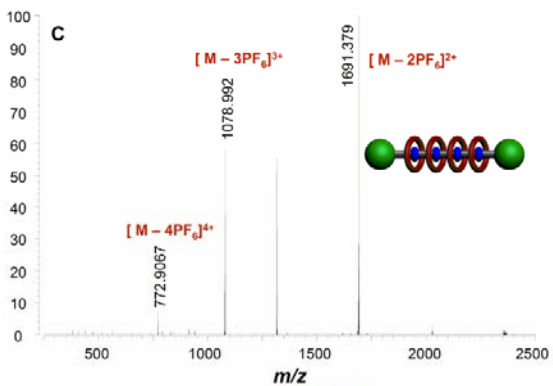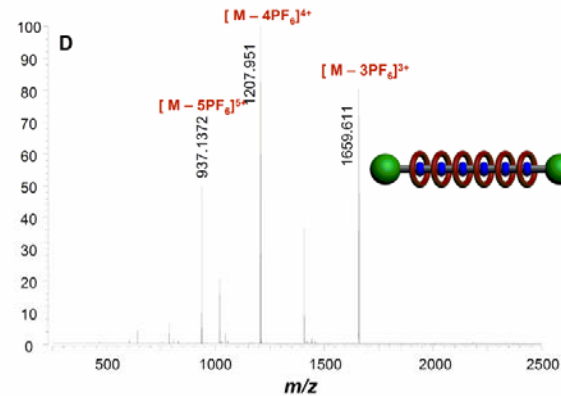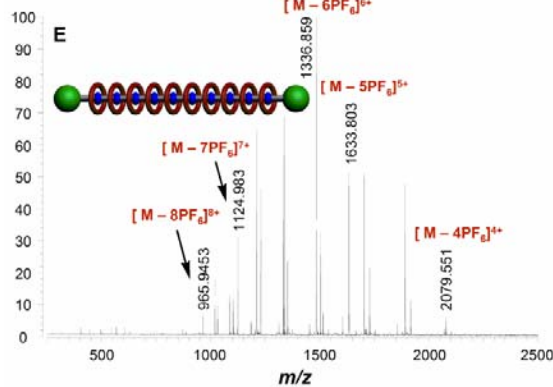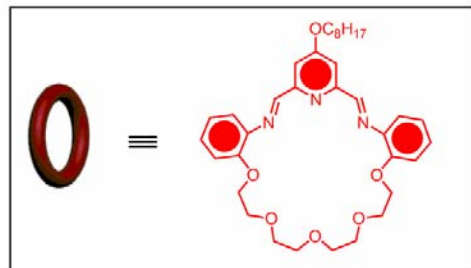

Supplement: pnas_0705847104_4.pdf [file pnas_0705847104_4.pdf]

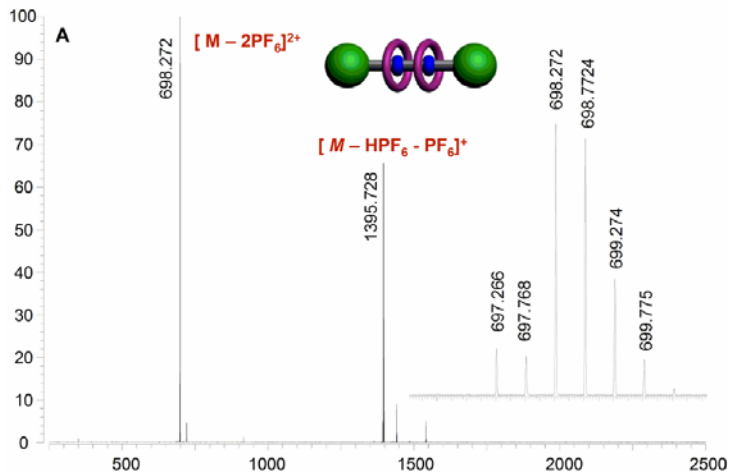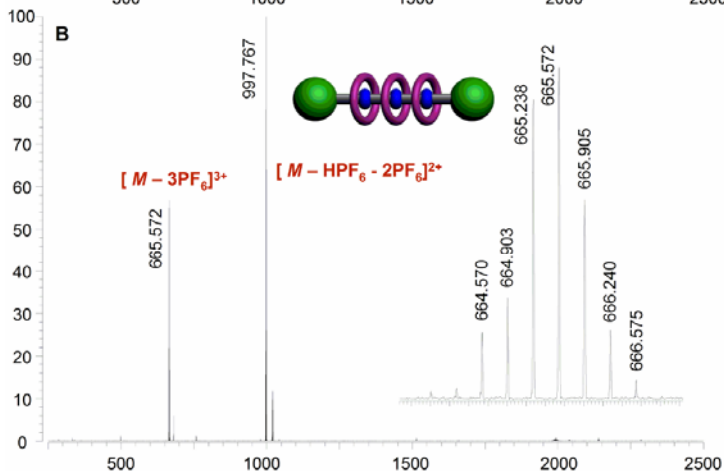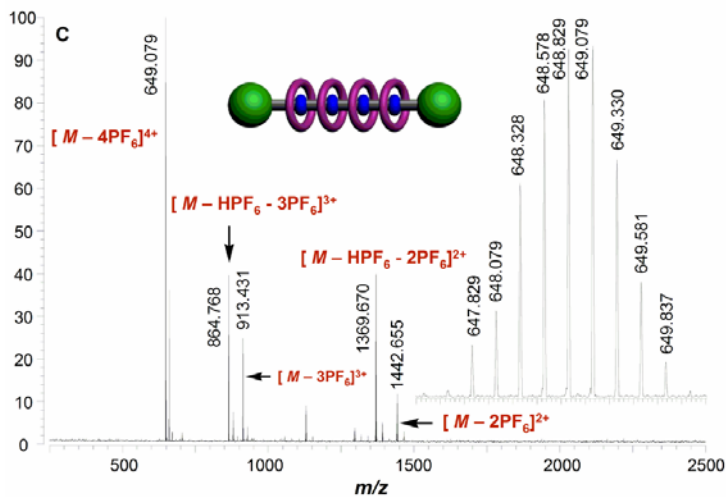

Supplement: pnas_0705847104_5.pdf [file pnas_0705847104_5.pdf]

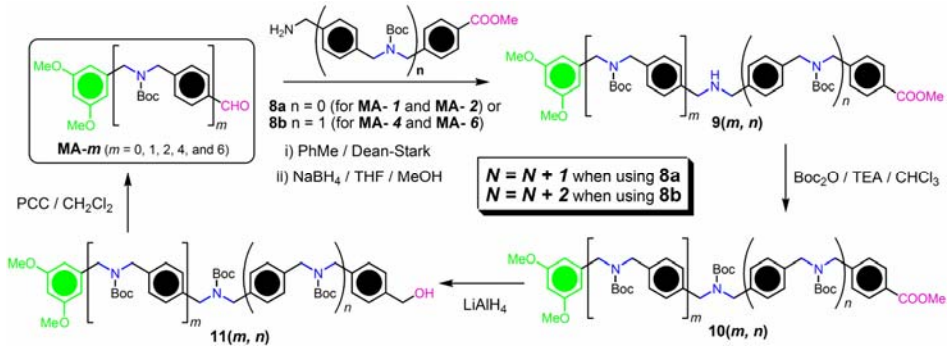

Supplement: pnas_0705847104_6.pdf [file pnas_0705847104_6.pdf]

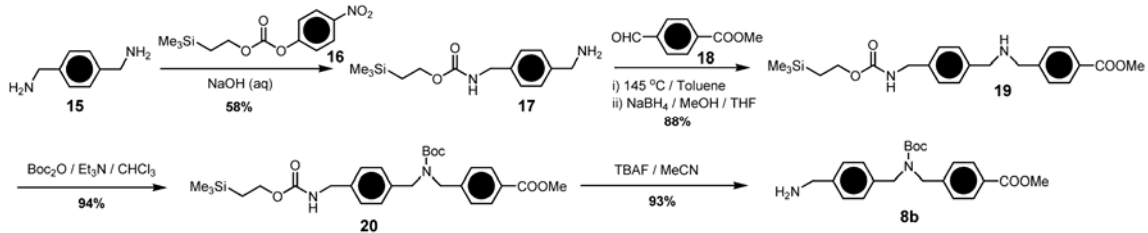

Supplement: pnas_0705847104_8.pdf [file pnas_0705847104_8.pdf]

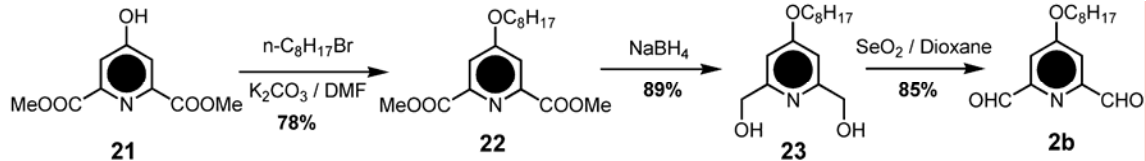

Supplement: pnas_0705847104_9.pdf [file pnas_0705847104_9.pdf]
